# Supplementary material for: Durable Efficacy of Dolutegravir Plus Lamivudine in Antiretroviral Treatment–Naive Adults With HIV-1 Infection: 96-Week Results From the GEMINI-1 and GEMINI-2 Randomized Clinical Trials
Source: PubMed Central journal article supplement — J Acquir Immune Defic Syndr. 2019 Dec 10;83(3):310–8. doi: 10.1097/QAI.0000000000002275 (PMC7043729; doi:10.1097/qai.0000000000002275), 2019-12-10
Supplement: qai-83-310-s001.pdf [file qai-83-310-s001.pdf]

## SUPPLEMENTAL DIGITAL CONTENT 1

### Supplemental Methods

#### Health outcomes

Assessments of health-related quality of life using the EuroQoL–5 Dimensions–5 Levels (EQ-5D-5L) Questionnaire<sup>1</sup> were planned for baseline; Weeks 4, 24, 48, 96, and 144; and study withdrawal. The EQ-5D-5L consists of 2 distinct scoring components: the health state utility score (potential range, –0.281 to 1) and the visual analog scale (VAS; potential range, 0-100). Higher scores on the EQ-5D-5L indicate better health.

#### Secondary endpoints<sup>2</sup>

- Proportion of participants with plasma HIV-1 RNA <50 copies/mL at Week 96 using the FDA Snapshot algorithm (Missing, Switch, or Discontinuation = Failure [MSD = F]) for the intention-to-treat–exposed (ITT-E) population
- Time to viral suppression (HIV-1 RNA <50 copies/mL)
- Absolute values and changes from baseline in CD4+ cell count at Weeks 48 and 96
- Incidence of disease progression (HIV-associated conditions, AIDS, and death)
- Incidence of treatment-emergent genotypic and phenotypic resistance to dolutegravir and lamivudine or tenofovir disoproxil fumarate/emtricitabine in participants meeting confirmed virologic withdrawal criteria
- Incidence and severity of adverse events (AEs) and laboratory abnormalities
- Proportion of participants who discontinued treatment because of AEs over 48 and 96 weeks
- Change from baseline in renal and bone biomarkers at Week 96
- Change from baseline in fasting lipids at Week 96

- Incidence of grade 2 or greater laboratory abnormalities in fasting LDL cholesterol by Week 96
- Proportion of participants by patient subgroups (eg, by age, sex, baseline CD4+ cell count) with plasma HIV-1 RNA <50 copies/mL at Week 96 using the Snapshot algorithm for the ITT-E population
- Change from baseline in CD4+ cell counts at Week 96 by patient subgroups
- Change from baseline in health-related quality of life using the EQ-5D-5L at Week 96 (or withdrawal from the study)

## References

1. Herdman M, Gudex C, Lloyd A, et al. Development and preliminary testing of the new five-level version of EQ-5D (EQ-5D-5L). *Qual Life Res.* 2011;20:1727–1736.
2. Cahn P, Madero JS, Arribas JR, et al. Dolutegravir plus lamivudine versus dolutegravir plus tenofovir disoproxil fumarate and emtricitabine in antiretroviral-naive adults with HIV-1 infection (GEMINI-1 and GEMINI-2): week 48 results from two multicentre, double-blind, randomised, non-inferiority, phase 3 trials. *Lancet.* 2019;393:143–155.

## SUPPLEMENTAL DIGITAL CONTENT 2

### Trial profile.

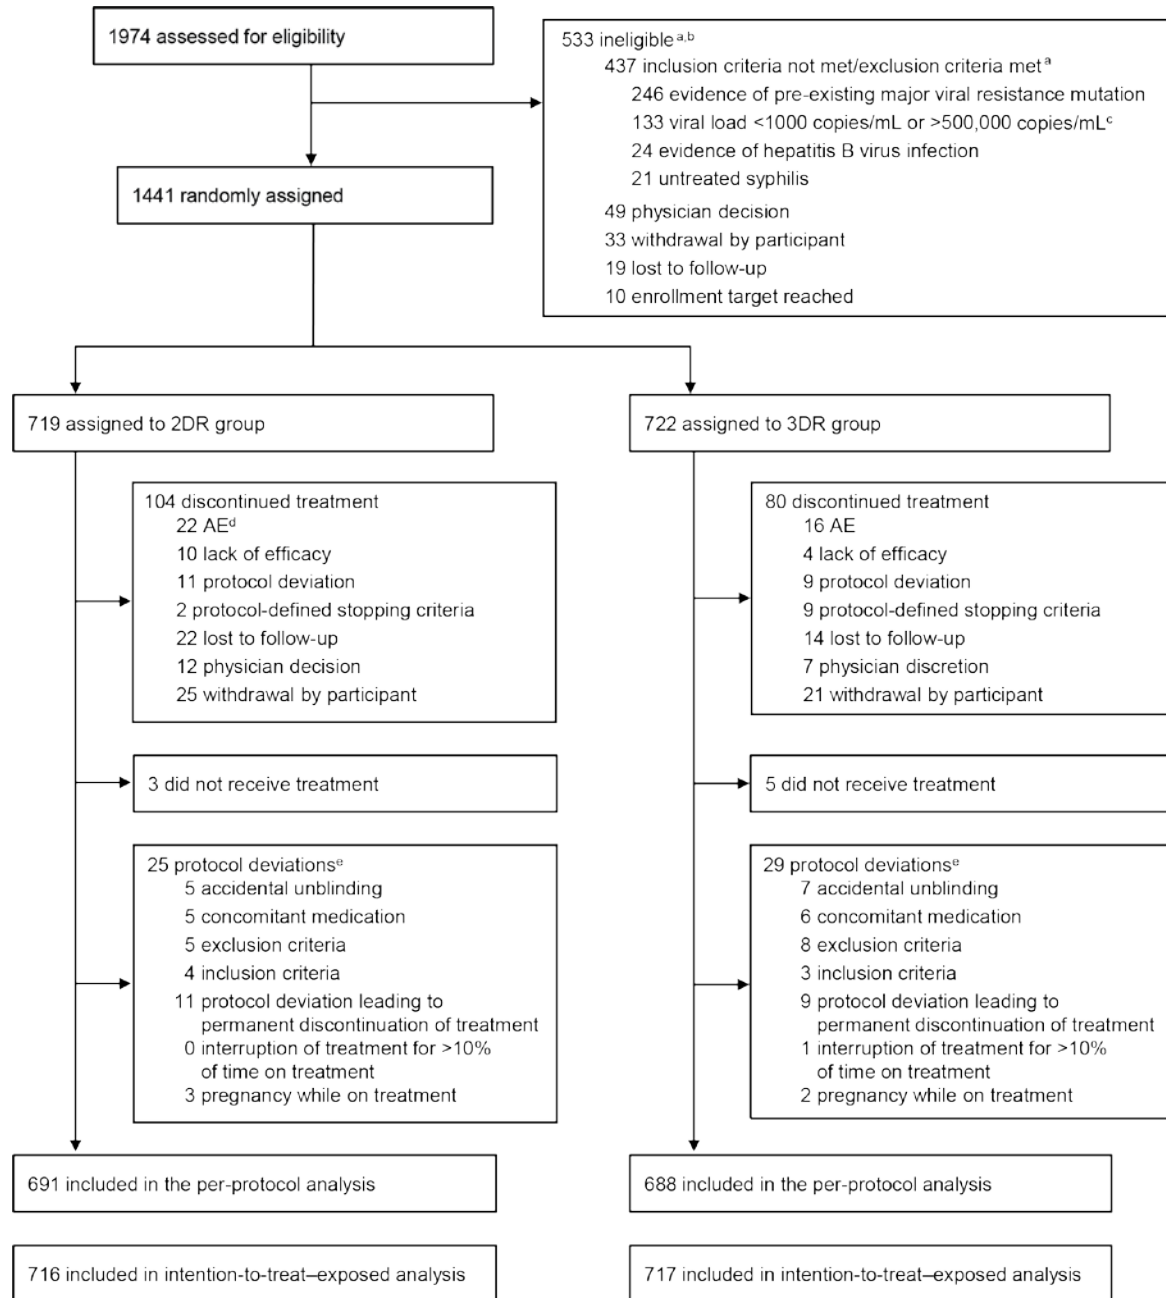

AE, adverse event; 2DR, 2-drug regimen (dolutegravir + lamivudine); 3DR, 3-drug regimen (dolutegravir + tenofovir disoproxil fumarate/emtricitabine). <sup>a</sup>Participants could have multiple reasons for ineligibility. <sup>b</sup>Most common reasons for not meeting inclusion criteria or meeting exclusion criteria listed. All other reasons occurred in <1% of participants. <sup>c</sup>Viral load criterion

was revised to allow enrollment of participants with plasma HIV-1 RNA of 1000-500,000 copies/mL on or after November 5, 2016. <sup>d</sup>Includes 1 fatal outcome in the GEMINI-1 study and 2 fatal outcomes in the GEMINI-2 study. All other AE-related withdrawals were non-fatal. <sup>e</sup>Protocol deviations leading to exclusion from the per-protocol population; participants could have had more than 1 reason.

### SUPPLEMENTAL DIGITAL CONTENT 3

Snapshot Analysis of Participants With HIV-1 RNA <50 Copies/mL at Week 96 in the ITT-E Population From GEMINI-1 and GEMINI-2

| Snapshot outcome, n (%)                                   | GEMINI-1       |                | GEMINI-2       |                |
|-----------------------------------------------------------|----------------|----------------|----------------|----------------|
|                                                           | 2DR<br>(N=356) | 3DR<br>(N=358) | 2DR<br>(N=360) | 3DR<br>(N=359) |
| HIV-1 RNA <50 copies/mL                                   | 300 (84.3)     | 320 (89.4)     | 316 (87.8)     | 322 (89.7)     |
| HIV-1 RNA ≥50 copies/mL                                   | 11 (3.1)       | 5 (1.4)        | 11 (3.1)       | 9 (2.5)        |
| Data in window and HIV-1 RNA ≥50 copies/mL                | 1 (0.3)        | 0              | 3 (0.8)        | 4 (1.1)        |
| Discontinued for lack of efficacy                         | 4 (1.1)        | 2 (0.6)        | 5 (1.4)        | 1 (0.3)        |
| Discontinued for other reason and HIV-1 RNA ≥50 copies/mL | 5 (1.4)        | 3 (0.8)        | 2 (0.6)        | 3 (0.8)        |
| Change in ART                                             | 1 (0.3)        | 0              | 1 (0.3)        | 1 (0.3)        |
| No virologic data at Week 96                              | 45 (12.6)      | 33 (9.2)       | 33 (9.2)       | 28 (7.8)       |
| Discontinued study because of AE or death                 | 12 (3.4)       | 13 (3.6)       | 10 (2.8)       | 8 (2.2)        |
| Discontinued study for other reasons                      | 33 (9.3)       | 20 (5.6)       | 23 (6.4)       | 18 (5.0)       |
| Withdrew consent                                          | 10 (2.8)       | 6 (1.7)        | 8 (2.2)        | 9 (2.5)        |
| Lost to follow-up                                         | 10 (2.8)       | 6 (1.7)        | 8 (2.2)        | 4 (1.1)        |
| Protocol deviation                                        | 6 (1.7)        | 5 (1.4)        | 4 (1.1)        | 3 (0.8)        |
| Physician decision                                        | 7 (2.0)        | 3 (0.8)        | 3 (0.8)        | 1 (0.3)        |
| Protocol-defined confirmed virologic withdrawal           | 0              | 0              | 0              | 1 (0.3)        |
| On study but missing data in window                       | 0              | 0              | 0              | 2 (0.6)        |

AE, adverse event; ART, antiretroviral therapy; 2DR, 2-drug regimen (dolutegravir + lamivudine); 3DR, 3-drug regimen (dolutegravir + tenofovir disoproxil fumarate/emtricitabine); ITT-E, intention-to-treat–exposed.

**SUPPLEMENTAL DIGITAL CONTENT 4**

Confirmed Virologic Withdrawals Through the Week 96 Analysis Window

| Week of failure confirmation | Baseline CD4+, cells/mm <sup>3</sup> | Time between SVW and CVW, day | Viral loads at baseline / SVW / CVW / and withdrawal, copies/mL | Resistance mutations         |                           | Fold change at baseline and CVW    |
|------------------------------|--------------------------------------|-------------------------------|-----------------------------------------------------------------|------------------------------|---------------------------|------------------------------------|
|                              |                                      |                               |                                                                 | Baseline                     | SVW                       |                                    |
| <b>2DR</b>                   |                                      |                               |                                                                 |                              |                           |                                    |
| Week 16                      | 212                                  | 7                             | 124,492 / 6648 / 56,435 / 95                                    | NRTI: none<br>INSTI: none    | NRTI: none<br>INSTI: none | DTG, 0.67, 0.72<br>3TC, 1.13, 1.12 |
| Week 24                      | 284                                  | 28                            | 50,263 / 348 / 206 / 96                                         | NRTI: none<br>INSTI: none    | NRTI: none<br>INSTI: none | DTG, 0.76, 0.7<br>3TC, 0.98, 0.69  |
| Week 24                      | 19                                   | 23                            | 368,439 / 212 / 376 / 362                                       | NRTI: none<br>INSTI: G193G/E | NRTI: none<br>INSTI: none | DTG, 0.88, 0.86<br>3TC, 1.02, 1.43 |
| Week 24                      | 213                                  | 27                            | 96,277 / 451 / 9602 / 67                                        | NRTI: none<br>INSTI: none    | NRTI: none<br>INSTI: none | DTG, 0.92, 0.8<br>3TC, 1.16, 1.16  |
| Week 24                      | 529                                  | 34                            | 17,232 / 461 / 251 / 59                                         | NRTI: none<br>INSTI: none    | NRTI: none<br>INSTI: none | DTG, 0.81, 0.87<br>3TC, 1.17, 1.09 |
| Week 48                      | 414                                  | 22                            | 37,701 / 43,908 / 38,457 <sup>a</sup>                           | NRTI: none<br>INSTI: none    | NRTI: none<br>INSTI: none | DTG, 0.8, 0.79<br>3TC, 0.9, 1.74   |
| Week 60                      | 347                                  | 101                           | 101,671 / 703 / 85,556 <sup>a</sup>                             | NRTI: none<br>INSTI: none    | NRTI: none<br>INSTI: none | DTG, 0.89, 1.13<br>3TC, 0.95, 0.87 |
| Week 60                      | 567                                  | 21                            | 7654 / 3972 / 3131 / 1513                                       | NRTI: none<br>INSTI: none    | NRTI: none<br>INSTI: none | DTG, 0.7, 0.71<br>3TC, 0.86, 0.86  |
| Week 72                      | 50                                   | 14                            | 63,817 / 422 / 2154 / 115                                       | NRTI: none<br>INSTI: none    | NRTI: none<br>INSTI: none | DTG, 0.64, 0.81<br>3TC, 0.84, 0.69 |
| Week 72                      | 74                                   | 27                            | 112,812 / 61,076 / 87,794 / 671                                 | NRTI: none<br>INSTI: none    | NRTI: none<br>INSTI: none | DTG, 0.84, 0.9<br>3TC, 0.84, 0.73  |

|                       |     |    |                                     |                              |                              |                                                       |
|-----------------------|-----|----|-------------------------------------|------------------------------|------------------------------|-------------------------------------------------------|
| Week 108 <sup>b</sup> | 317 | 31 | 341,818 / 396 / 726 / 280           | NRTI: none<br>INSTI: L74I    | NRTI: none<br>INSTI: L74I    | DTG, 0.72, 0.83<br>3TC, 1.09, 1.04                    |
| <b>3DR</b>            |     |    |                                     |                              |                              |                                                       |
| Week 12               | 22  | 28 | 136,753 / 393 / 276 <sup>c</sup>    | NRTI: none<br>INSTI: none    | NRTI: none<br>INSTI: none    | DTG, 0.95, 1.03<br>TDF, 0.98, 0.99<br>FTC, 0.86, 1.10 |
| Week 24               | 226 | 27 | 10,930 / 1136 / 809 / 264           | NRTI: none<br>INSTI: none    | NRTI: none<br>INSTI: none    | DTG, 0.72, NR<br>TDF, 1, 0.81<br>FTC, 0.92, 0.95      |
| Week 24               | 251 | 30 | 76,325 / 569 / 362 / <50            | NRTI: none<br>INSTI: none    | NRTI: none<br>INSTI: none    | DTG, 0.68, 1.38<br>TDF, 0.95, 0.61<br>FTC, 1.13, 0.67 |
| Week 24               | 201 | 28 | 156,701 / 213 / 1559 / 97           | NRTI: none<br>INSTI: none    | NRTI: none<br>INSTI: none    | DTG, 0.9, NR<br>TDF, 1.04, 1.07<br>FTC, 0.97, 1.01    |
| Week 48               | 602 | 83 | 1568 / 8384 / 3653 / 3011           | NRTI: L70K/E<br>INSTI: G193E | NRTI: none<br>INSTI: G193G/E | DTG, 1.05, 1.05<br>TDF, 0.76, 0.77<br>FTC, 1.14, 1.28 |
| Week 72               | 253 | 16 | 668,811 / 254 / 232 / 121           | NRTI: none<br>INSTI: none    | NRTI: none<br>INSTI: none    | DTG, 1.13, NR<br>TDF, 0.71, NR<br>FTC, 0.68, NR       |
| Week 96               | 144 | 40 | 28,905 / 30,316 / 7793 <sup>a</sup> | NRTI: none<br>INSTI: L74I    | NRTI: none<br>INSTI: L74I    | DTG, 0.68, 0.78<br>TDF, 0.82, 0.95<br>FTC, 1.07, 0.82 |

CVW, confirmed virologic withdrawal; 2DR, 2-drug regimen (dolutegravir + lamivudine); 3DR, 3-drug regimen (dolutegravir + tenofovir disoproxil fumarate/emtricitabine); DTG, dolutegravir; FTC, emtricitabine; INSTI, integrase strand transfer inhibitor; NR, not reported because of assay failure; NRTI, nucleoside reverse transcriptase inhibitor; SVW, suspected virologic withdrawal; 3TC, lamivudine; TDF, tenofovir disoproxil fumarate.

<sup>a</sup>Participant met CVW at the withdrawal visit; no subsequent visit occurred. <sup>b</sup>Participant met SVW criteria within the Week 96 window, with confirmatory viral load at Week 108. <sup>c</sup>Participant met the criteria for CVW at Week 12 but was not reported at the Week 48 analysis because of a laboratory reporting error identified after the Week 48 analysis. This participant was not withdrawn as per protocol at the time and has been allowed to continue in the study (the participant has maintained virologic suppression from Week 24 through Week 108).

## SUPPLEMENTAL DIGITAL CONTENT 5

Snapshot analysis of the proportion of participants with HIV-1 RNA <50 copies/mL by subgroup in the ITT-E population at Week 96, with unadjusted treatment group differences (95% CI).

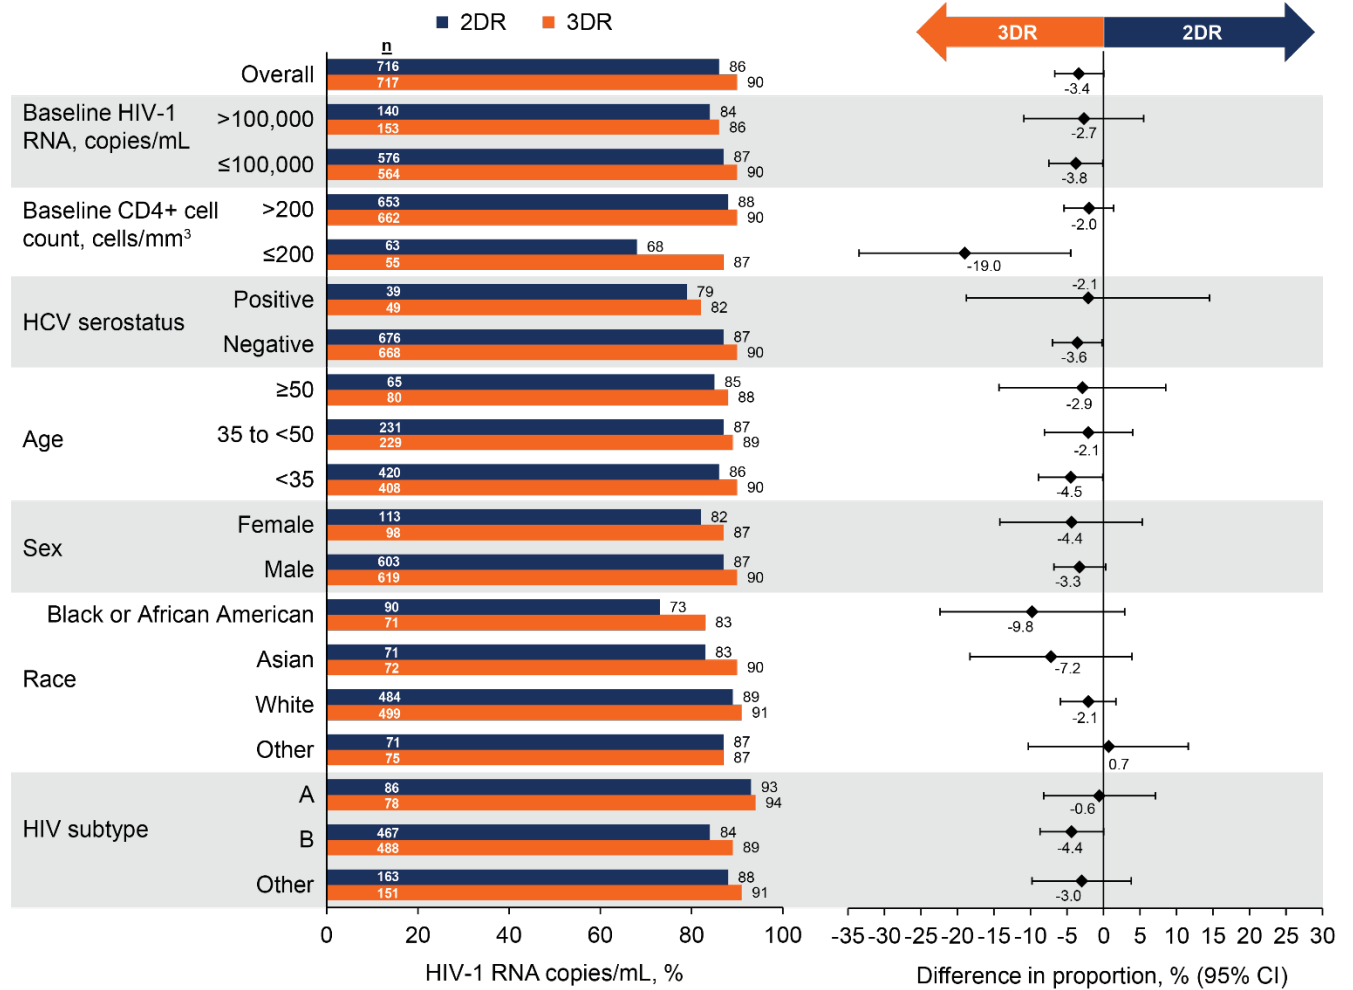

2DR, 2-drug regimen (dolutegravir + lamivudine); 3DR, 3-drug regimen (dolutegravir + tenofovir disoproxil fumarate/emtricitabine); HCV, hepatitis C virus; ITT-E, intention-to-treat-exposed.



## SUPPLEMENTAL DIGITAL CONTENT 6

Reasons for Snapshot Non-response in the Subgroup of Participants With Baseline CD4+ Cell Count  $\leq 200$  Cells/mm<sup>3</sup>

| Participants, n (%)                                  | 2DR<br>(N=63) | 3DR<br>(N=55)        |
|------------------------------------------------------|---------------|----------------------|
| Snapshot non-response                                | 20 (31.7)     | 7 (12.7)             |
| Protocol-defined confirmed virologic withdrawal      | 3 (4.8)       | 1 (1.8) <sup>a</sup> |
| HIV-1 RNA $\geq 50$ copies/mL and continued in study | 2 (3.2)       | 0                    |
| Discontinued because of treatment-related AE         | 1 (1.6)       | 0                    |
| Discontinued because of non-treatment-related AE     | 2 (3.2)       | 0                    |
| Protocol violation (eligibility criteria not met)    | 2 (3.2)       | 0                    |
| Lost to follow-up                                    | 3 (4.8)       | 3 (5.5)              |
| Withdrew consent                                     | 4 (6.3)       | 2 (3.6)              |
| Withdrew to start HCV treatment                      | 1 (1.6)       | 0                    |
| Change in ART due to incarceration                   | 1 (1.6)       | 0                    |
| Investigator discretion (incarceration)              | 0             | 1 (1.8)              |
| Pregnancy                                            | 1 (1.6)       | 0                    |

AE, adverse event; ART, antiretroviral therapy; 2DR, 2-drug regimen (dolutegravir + lamivudine); 3DR, 3-drug regimen (dolutegravir + tenofovir disoproxil fumarate/emtricitabine); HCV, hepatitis C virus. <sup>a</sup>One participant met the criteria for confirmed virologic withdrawal at Week 12 but was not reported at the Week 48 analysis because of a laboratory reporting error identified after the Week 48 analysis. This participant was not withdrawn as per protocol at the time and has been allowed to continue in the study (the participant has maintained virologic suppression from Week 24 and at the Week 96 Snapshot analysis and is therefore not considered a Snapshot non-responder).

## SUPPLEMENTAL DIGITAL CONTENT 7

Snapshot Outcomes at Week 96 in Participants with Baseline HIV-1 RNA >500,000

Copies/mL

| Baseline HIV-1 RNA,<br>copies/mL | Baseline CD4+ cell count,<br>cells/mm <sup>3</sup> | Week 96 Snapshot<br>outcome <50 copies/mL |
|----------------------------------|----------------------------------------------------|-------------------------------------------|
| 2DR (n=13)                       |                                                    |                                           |
| 502,915                          | 147                                                | ≥50 copies/mL <sup>a</sup>                |
| 510,168                          | 229                                                | ✓                                         |
| 523,934                          | 305                                                | ✓                                         |
| 558,856                          | 337                                                | No virologic data <sup>b</sup>            |
| 577,561                          | 314                                                | ✓                                         |
| 579,350                          | 437                                                | ✓                                         |
| 582,666                          | 454                                                | ✓                                         |
| 586,886                          | 168                                                | ✓                                         |
| 833,905                          | 219                                                | No virologic data <sup>b</sup>            |
| 902,151                          | 316                                                | ✓                                         |
| 934,790                          | 255                                                | ✓                                         |
| 1,341,981                        | 262                                                | ✓                                         |
| 1,848,435                        | 22                                                 | No virologic data <sup>c</sup>            |
| 3DR (n=15)                       |                                                    |                                           |
| 500,265                          | 268                                                | ✓                                         |
| 503,837                          | 279                                                | ✓                                         |
| 524,883                          | 38                                                 | No virologic data <sup>b</sup>            |
| 593,008                          | 428                                                | ✓                                         |
| 630,132                          | 19                                                 | ✓                                         |
| 633,199                          | 445                                                | ✓                                         |
| 675,028                          | 131                                                | ✓                                         |
| 690,490                          | 112                                                | No virologic data <sup>b</sup>            |
| 707,457                          | 226                                                | ✓                                         |
| 750,721                          | 335                                                | ✓                                         |
| 764,540                          | 520                                                | ✓                                         |
| 877,058                          | 276                                                | ✓                                         |
| 953,600                          | 544                                                | No virologic data <sup>b</sup>            |

|           |     |   |
|-----------|-----|---|
| 987,059   | 245 | ✓ |
| 2,317,510 | 27  | ✓ |

---

AE, adverse event; 2DR, 2-drug regimen (dolutegravir + lamivudine); 3DR, 3-drug regimen (dolutegravir + tenofovir disoproxil fumarate/emtricitabine). <sup>a</sup>Participant had HIV-1 RNA 80 copies/mL at Week 96. <sup>b</sup>Participants discontinued before Week 96 for reason other than efficacy or AEs with HIV-1 RNA <50 copies/mL at last on-study assessment. <sup>c</sup>Participant discontinued shortly after baseline for not meeting entry criteria (screening HIV-1 RNA >500,000 copies/mL).

## SUPPLEMENTAL DIGITAL CONTENT 8

Post hoc analysis of the proportion of participants with BMI shift at Week 96 with **(A)** normal or **(B)** overweight BMI at baseline in the pooled safety population from GEMINI-1 and GEMINI-2.

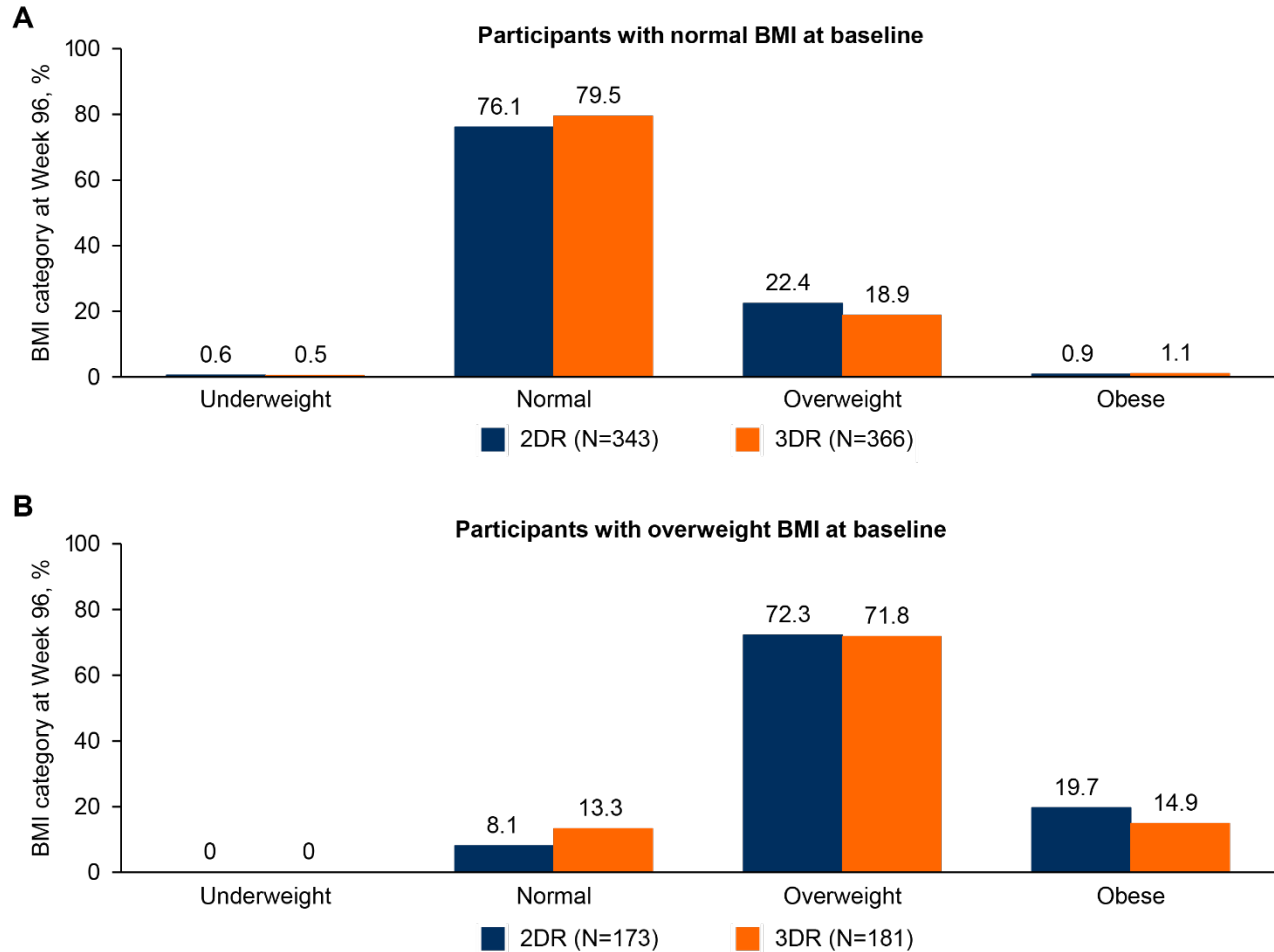

BMI, body mass index; 2DR, 2-drug regimen (dolutegravir + lamivudine); 3DR, 3-drug regimen (dolutegravir + tenofovir disoproxil fumarate/emtricitabine).

## SUPPLEMENTAL DIGITAL CONTENT 9

Mean change from baseline in serum or plasma lipids at Week 96.

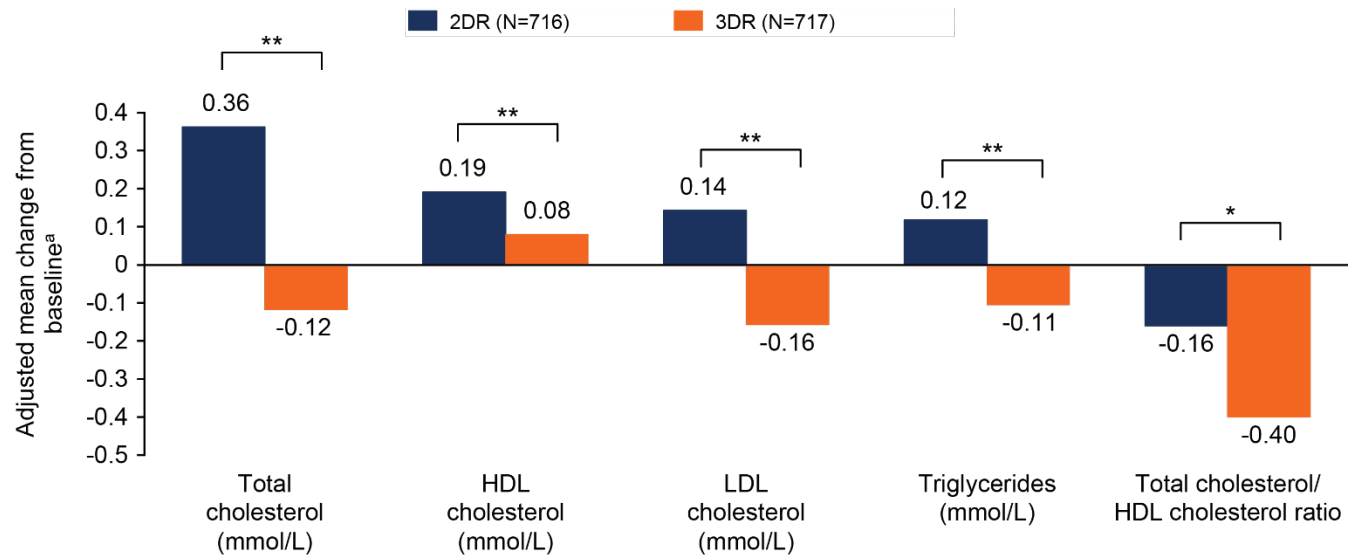

2DR, 2-drug regimen (dolutegravir + lamivudine); 3DR, 3-drug regimen (dolutegravir + tenofovir disoproxil fumarate/emtricitabine); HDL, high-density lipoprotein; LDL, low-density lipoprotein.

<sup>a</sup>The 96-week analysis used mixed-effect model repeat measurement. Mean change from baseline adjusted for study, treatment, visit, baseline plasma HIV-1 RNA, baseline CD4+ cell count, age, baseline value, treatment-by-visit interaction, and baseline value-by-visit interaction. No assumptions were made about the correlations between participant readings of biomarkers (the correlation matrix for within-participant errors was unstructured). \* $P < 0.05$ . \*\* $P < 0.001$ .

**SUPPLEMENTAL DIGITAL CONTENT 10**

Baseline and Week 96 Scores on EQ-5D-5L Health State Utility Scale and VAS

|          | 2DR                 |                    | 3DR                 |                    | Adjusted mean change (95% CI) | P value |
|----------|---------------------|--------------------|---------------------|--------------------|-------------------------------|---------|
|          | Baseline, mean (SD) | Week 96, mean (SD) | Baseline, mean (SD) | Week 96, mean (SD) |                               |         |
| EQ-5D-5L | 0.950<br>(0.076)    | 0.960<br>(0.083)   | 0.940<br>(0.105)    | 0.957<br>(0.088)   | -0.0008<br>(-0.0088, 0.0072)  | 0.843   |
| VAS      | 86.5<br>(12.1)      | 90.3<br>(10.4)     | 85.1<br>(13.4)      | 89.3<br>(11.2)     | 0.5<br>(-0.5, 1.5)            | 0.361   |

2DR, 2-drug regimen (dolutegravir + lamivudine); 3DR, 3-drug regimen (dolutegravir + tenofovir disoproxil fumarate/emtricitabine); EQ-5D-5L, EuroQol-5 Dimensions-5 Levels; SD, standard deviation; VAS, visual analog scale.

## SUPPLEMENTAL DIGITAL CONTENT 11

### GEMINI-1 and GEMINI-2 Investigators

**Argentina:** Cahn, Cassetti, David, Figueras, Figueroa, Losso, Lopardo, Lupo, Porteiro, Sánchez

**Australia:** Bloch, Cooper, Finlayson, Kelleher, Koh, Lewis, McMahon, Moore, Roth, Shields

**Belgium:** De Wit, Florence, Goffard, Demeester, Lacor, Vandercam, Vandekerckhove

**Canada:** Angel, Baril, Conway, de Pokomandy, Szabo, Walmsley

**France:** Bouchaud, Chidiac, Delobel, Girard, Goujard, Katlama, Molina, Pialoux, Philibert

**Germany:** Bogner, Esser, Krznaric, Lehmann, Rockstroh, Spinner, Stellbrink, Stephan, Stoehr

**Italy:** Antinori, Barchi, Caramello, Castelli, Cattelan, D'Arminio Montforte, Di Biargo, Di Perri, Gori, Gulminetti, Lazzarin, Maggiolo, Menzaghi, Migliorino, Mussini, Penco, Puoti, Quirino, Rizzardini, Sighinolfi, Viale

**Mexico:** Amaya Tapia, Andrade Villanueva, Granados Reyes, Sierra-Madero, Perez Rios, Santoscoy Gomez

**Netherlands:** Den Hollander, Rijnders

**Peru:** Hidalgo, Hercilla, Illescas

**Poland:** Olczak

**Portugal:** Correia Pacheco, Mansinho, Saraiva da Cunha, Sarmento e Castro, Serrão, Teófilo

**Romania:** Arbune, Jianu, Oprea, Preotescu, Prisacariu

**Republic of Korea:** Lee, Kim S-W, Kim S-I, Kim WJ

**Russia:** Belonosova, Borodkina, Chernova, Gankina, Kizhlo, Kulagin, Kurina, Nagimova, Pokrovsky, Riamova, Voronin, Yakovlev

**South Africa:** Kaplan

**Spain:** Antela Lopez, Arribas Lopez, Casado Osorio, Castabo Carracedo, De Los Santos Gil, Estrada Perez, Falco Ferrer, Force, Galinda Puerto, Garcia Deltoro, Gatell, Goenaga Sanchez, Gonzalez Cordon, Knobel, Lopez Bernaldo de Quiros, Losa Garcia, Masia, Montero-Alonso,

Ocampo Hermida, Pasquau Liapo, Portilla Sogorb, Pulido, Rivero Roman, Santos Fernandez,  
Torres Perea, Troya, Viciano

**Switzerland:** Calmy, Hauser, Fehr

**Taiwan:** Cheng, Huang, Hung, Ko, Lin, Lu, Tseng, Wang, Wong, Wu, Yang

**USA:** Arduino, Benson, Berhe, Bredeek, Brinson, Campbell, Crofoot, Cunningham, DeJesus,  
Dretler, Eron, Fichtenbaum, Flamm, Goldstein, Gupta, Hagins, Hoffman-Terry, Jayaweera,  
Kinder, Klein, McDonald, Mills, Nahass, Ortiz, Osiyemi, Overton, Parks, Prelutsky, Ramgopal,  
Schrader, Sha, Simon, Sims, Skiest, Slim, Tashima, Thedinger

**United Kingdom:** Clarke, Gazzard, Fox, Johnson, Kegg, Khoo, Mazhude, Orkin, Schembri,  
Ustianowski
